# Supplementary material
Source: PubMed Central journal article supplement (PMC4810783)
Supplement: NIHMS759364-supplement-supplement_1.pdf [file NIHMS759364-supplement-supplement_1.pdf]

1 **Supplemental Tables for only those women without a history of preterm birth:**

2 Supplemental Table 1: Risk factors for declining cervical length screening in  
3 women without a history of preterm birth.

| <b>Risk Factor<br/>n= 11531</b>                                 | <b>Cervical Length<br/>Not Screened<br/>(n=1675, 14.5%)</b> | <b>Cervical Length<br/>Screened<br/>(n=9856, 85.5%)</b> | <b>Adjusted Odds<br/>Ratio<sup>1</sup> (95%<br/>Confidence<br/>Interval)</b> |
|-----------------------------------------------------------------|-------------------------------------------------------------|---------------------------------------------------------|------------------------------------------------------------------------------|
| Age (years)<br>Median, IQR                                      | 27 (23,32)                                                  | 30 (25,33)                                              | p<0.0001                                                                     |
| Age less than 35                                                | 1442 (86.1%)                                                | 7946 (80.6%)                                            | <b>1.35 (1.16,1.57)</b>                                                      |
| Gestational Age at<br>scan (weeks)<br>(Mean $\pm$ SD)           | 20.1 $\pm$ 1.6                                              | 19.9 $\pm$ 1.2                                          | 1.04 (0.99,1.08)                                                             |
| Caucasian                                                       | 519 (30.1%)                                                 | 5025 (51.0%)                                            | Reference                                                                    |
| African American                                                | 754 (45.0%)                                                 | 3015 (30.6%)                                            | <b>2.19 (1.93,2.49)</b>                                                      |
| Hispanic                                                        | 94 (5.6%)                                                   | 469 (4.8%)                                              | <b>1.83 (1.43,2.33)</b>                                                      |
| Other<br>race/ethnicity                                         | 142 (8.5%)                                                  | 601 (6.1%)                                              | <b>2.33 (1.90,2.86)</b>                                                      |
| Race/ethnicity not<br>reported                                  | 166 (9.9%)                                                  | 746 (7.6%)                                              | <b>1.99 (1.64,2.42)</b>                                                      |
| Tobacco Use                                                     | 166 (9.9%)                                                  | 623 (6.3%)                                              | <b>1.40 (1.16,1.68)</b>                                                      |
| Maternal Body<br>Mass Index (kg/m <sup>2</sup> )<br>Median, IQR | 24.9 (21.5,30.2)                                            | 24.3 (21.4,29.3)                                        | p=0.005                                                                      |
| Normal Weight                                                   | 1115 (66.6%)                                                | 7105 (72.1%)                                            | Reference                                                                    |
| Obese                                                           | 560 (33.4%)                                                 | 2751 (27.9%)                                            | <b>1.11 (1.01, 1.24)</b>                                                     |
| Morbid Obesity                                                  | 270 (16.1%)                                                 | 1137 (11.5%)                                            | <b>1.38 (1.23, 1.56)</b>                                                     |
| Multiparity                                                     | 1179 (70.4%)                                                | 6342 (64.4%)                                            | <b>1.32 (1.17,1.48)</b>                                                      |

4 1. Multivariable model including age less than 35, gestational age at scan, race/ethnicity, tobacco, obesity, and  
5 multiparity  
6

1  
2 Supplemental Table 2: Gestational age at delivery in screened and unscreened  
3 women without a history of preterm birth.

| <b>Outcome<br/>n= 10328</b>                              | <b>Cervical Length<br/>Not Screened<br/>(n=1491 14.4%)</b> | <b>Cervical Length<br/>Screened<br/>(n=8837 85.6%)</b> | <b>aOR<sup>1</sup> (95%<br/>Confidence<br/>Interval)</b> |
|----------------------------------------------------------|------------------------------------------------------------|--------------------------------------------------------|----------------------------------------------------------|
| Mean Gestational Age at Delivery (weeks) (mean $\pm$ SD) | 37.5 $\pm$ 4.5                                             | 38.3 $\pm$ 2.6                                         | p<0.0001                                                 |
| Spontaneous preterm birth < 37 weeks <sup>1</sup>        | 96 (6.4%)                                                  | 507 (5.7%)                                             | 1.03 (0.82,1.29)                                         |
| Spontaneous preterm birth < 34 weeks <sup>1</sup>        | 42 (2.8%)                                                  | 162 (1.8%)                                             | 1.34 (0.94,1.89)                                         |
| Spontaneous preterm birth < 28 weeks <sup>1</sup>        | 30 (2.0%)                                                  | 64 (0.7%)                                              | <b>2.39 (1.54,3.74)</b>                                  |
| Spontaneous preterm birth <24 weeks <sup>1</sup>         | 23 (1.5%)                                                  | 31 (0.35%)                                             | <b>3.95 (2.27, 6.86)</b>                                 |

4 1. Adjusted for race/ethnicity and tobacco use.

5
